# Supplementary material for: Identification of the U(v) complex (C5Me5)2UVI(NSiMe3) in the reaction of (C5Me5)2UIIII(THF) with N3SiMe3
Source: Royal Society of Chemistry journal article supplement (doi:10.1039/d2dt01926d), 2022-01-01
Supplement: d2dt01926d1.pdf [file d2dt01926d1.pdf]

Supporting Information for:

**Identification of the U(V) Complex  $(C_5Me_5)_2U^VI(=NSiMe_3)$**

**in the Reaction of  $(C_5Me_5)_2U^{III}(THF)$  with  $N_3SiMe_3$**

Justin C. Wedal, Joseph W. Ziller, and William J. Evans\*

Department of Chemistry, University of California, Irvine, California 92697, United States

Email: [wevans@uci.edu](mailto:wevans@uci.edu)

\*To whom correspondence should be addressed.

|                                   |            |
|-----------------------------------|------------|
| <b>Table of Contents</b>          |            |
| <b>Experimental Details</b>       | <b>S3</b>  |
| <b>NMR Spectra</b>                | <b>S5</b>  |
| <b>Crystallographic Data</b>      | <b>S8</b>  |
| <b>References and Definitions</b> | <b>S16</b> |

## Experimental Details

*Caution!*  $^{238}\text{U}$  is an alpha emitter with a half-life of approximately  $4.5 \times 10^9$  years. Samples should only be handled in laboratories equipped with appropriate radiological safety controls and radiation-counting equipment.

All syntheses and manipulations described below were conducted under argon with rigorous exclusion of air and water using standard glovebox and vacuum line techniques. Solvents were sparged with UHP argon and dried by passage through columns containing Q-5 and molecular sieves prior to use. Deuterated NMR solvents were dried over NaK alloy, degassed by three freeze-pump-thaw cycles, and vacuum transferred before use.  $^1\text{H}$  spectra were recorded on a CRYO500 MHz at 298 K and referenced to residual protio-solvent resonances.  $(\text{C}_5\text{Me}_5)_2\text{U}^{\text{III}}\text{I}(\text{THF})^{1,2}$  was prepared as previously described.  $\text{N}_3\text{SiMe}_3$  was degassed by three freeze-pump-thaw cycles before use.  $\text{PhN}=\text{NPh}$  was sublimed prior to use.  $\text{N}_3\text{Ad}$  was used as received.

**Crystallization of  $(\text{C}_5\text{Me}_5)_2\text{U}^{\text{VI}}(\text{=NSiMe}_3)$ , **1**.**  $(\text{C}_5\text{Me}_5)_2\text{U}^{\text{III}}\text{I}(\text{THF})$  (50 mg, 0.071 mmol) was dissolved in toluene (2 mL) to form a dark green solution.  $\text{N}_3\text{SiMe}_3$  (9 mg, 0.078 mmol) was dissolved in toluene (0.5 mL) and added to the stirred solution. The solution became brown. The solution was stirred for two hours and then dried under vacuum. Hexane (5 mL) was added to form a brown suspension. The mixture was centrifuged to remove the solids and dried under vacuum.  $^1\text{H}$  NMR and IR spectroscopy showed the presence of a new paramagnetic compound. Brown X-ray quality crystals of **1** were grown from a concentrated hexane solution at  $-35\text{ }^\circ\text{C}$ .

**Reaction of  $(\text{C}_5\text{Me}_5)_2\text{U}^{\text{III}}\text{I}(\text{THF})$  and  $\text{N}_3\text{SiMe}_3$ .**  $(\text{C}_5\text{Me}_5)_2\text{U}^{\text{III}}\text{I}(\text{THF})$  (100 mg, 0.141 mmol) was dissolved in toluene (5 mL) to form a dark green solution.  $\text{N}_3\text{SiMe}_3$  (18 mg, 0.16 mmol) was dissolved in toluene (0.5 mL) and added to the stirred solution by pipet. The solution

became dark brown immediately. The solution was stirred for 30 minutes and then dried under vacuum. Hexane (8 mL) was added and the solution was stirred for one hour. Red solids were removed by filtration and the solution was dried to yield brown solids (68 mg, 67%). The  $^1\text{H}$  NMR spectrum in  $\text{C}_6\text{D}_6$  showed a ratio of roughly 3:4 of  $(\text{C}_5\text{Me}_5)_2\text{U}^{\text{VI}}(\text{=NSiMe}_3)_2$  ( $\delta$  4.91 ppm,  $\text{C}_5\text{Me}_5$ )<sup>3</sup> to  $(\text{C}_5\text{Me}_5)_2\text{U}^{\text{VI}}\text{I}_2$  ( $\delta$  17.99 ppm,  $\text{C}_5\text{Me}_5$ ).<sup>4</sup>

**Reaction of  $(\text{C}_5\text{Me}_5)_2\text{U}^{\text{III}}\text{I}(\text{THF})$  and  $\text{N}_3\text{Ad}$ .** As above,  $(\text{C}_5\text{Me}_5)_2\text{U}^{\text{III}}\text{I}(\text{THF})$  (50 mg, 0.071 mmol) and  $\text{N}_3\text{Ad}$  (13 mg, 0.073 mmol) were combined in toluene (5 mL) to form a brown solution. Slight gas evolution was observed. The solution was dried and the products were extracted into hexane (47 mg, 85%). The  $^1\text{H}$  NMR spectrum in  $\text{C}_6\text{D}_6$  showed a ratio of roughly 3:4  $(\text{C}_5\text{Me}_5)_2\text{U}^{\text{VI}}(\text{=NAd})_2$  ( $\delta$  4.07 ppm,  $\text{C}_5\text{Me}_5$ )<sup>5</sup> to  $(\text{C}_5\text{Me}_5)_2\text{U}^{\text{VI}}\text{I}_2$  ( $\delta$  18.00 ppm,  $\text{C}_5\text{Me}_5$ ).<sup>4</sup> Brown crystals of  $(\text{C}_5\text{Me}_5)_2\text{U}^{\text{VI}}(\text{=NAd})_2$  were grown from a concentrated toluene solution at  $-35$  °C and identified by X-ray diffraction.<sup>5</sup>

**Reaction of  $(\text{C}_5\text{Me}_5)_2\text{U}^{\text{III}}\text{I}(\text{THF})$  and  $\text{PhN=NPh}$ .** As above,  $(\text{C}_5\text{Me}_5)_2\text{U}^{\text{III}}\text{I}(\text{THF})$  (50 mg, 0.071 mmol) and  $\text{PhN=NPh}$  (6.5 mg, 0.036 mmol) were combined in toluene (5 mL) to form a red/brown solution. The solution was stirred for 30 minutes and then dried. The products were extracted into hexane, filtered, and dried to yield dark brown solids (39 mg, 76%). The  $^1\text{H}$  NMR spectrum in  $\text{C}_6\text{D}_6$  showed a ratio of roughly 2:3  $(\text{C}_5\text{Me}_5)_2\text{U}^{\text{VI}}(\text{=NPh})_2$  ( $\delta$  4.11 ppm,  $\text{C}_5\text{Me}_5$ )<sup>6</sup> to  $(\text{C}_5\text{Me}_5)_2\text{U}^{\text{VI}}\text{I}_2$  ( $\delta$  17.95 ppm,  $\text{C}_5\text{Me}_5$ ).<sup>4</sup>

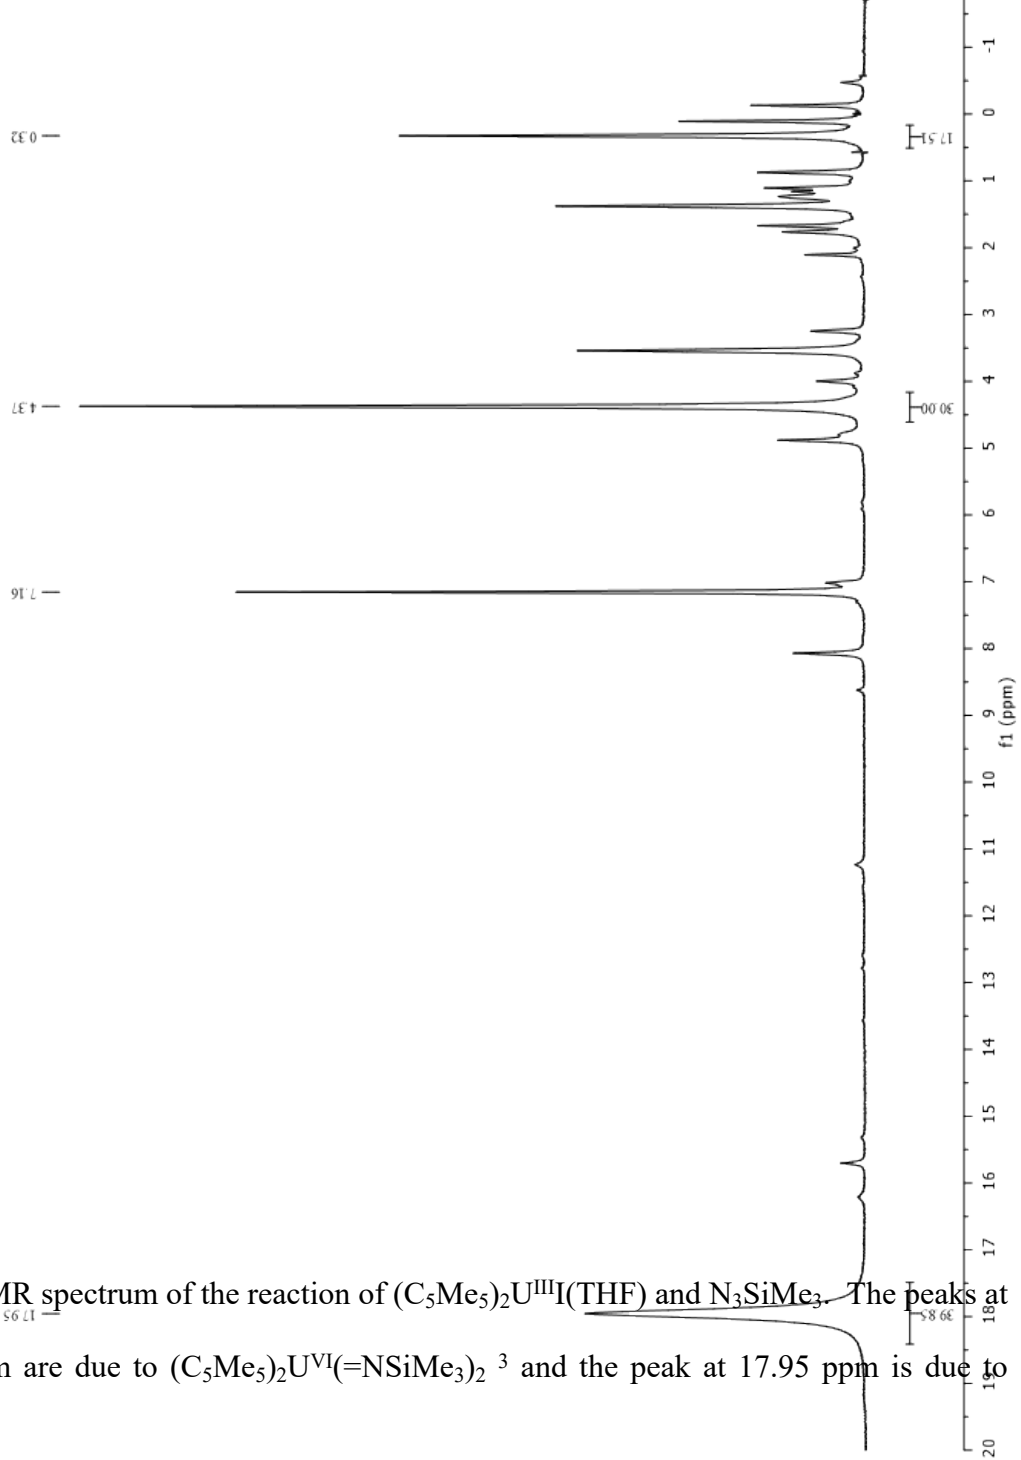

**Figure S1:**  $^1\text{H}$  NMR spectrum of the reaction of  $(\text{C}_5\text{Me}_5)_2\text{U}^{\text{III}}\text{I}(\text{THF})$  and  $\text{N}_3\text{SiMe}_3$ . The peaks at 4.37 and 0.32 ppm are due to  $(\text{C}_5\text{Me}_5)_2\text{U}^{\text{VI}}(\text{=NSiMe}_3)_2$ <sup>3</sup> and the peak at 17.95 ppm is due to  $(\text{C}_5\text{Me}_5)_2\text{U}^{\text{VI}}\text{I}_2$ .<sup>4</sup>

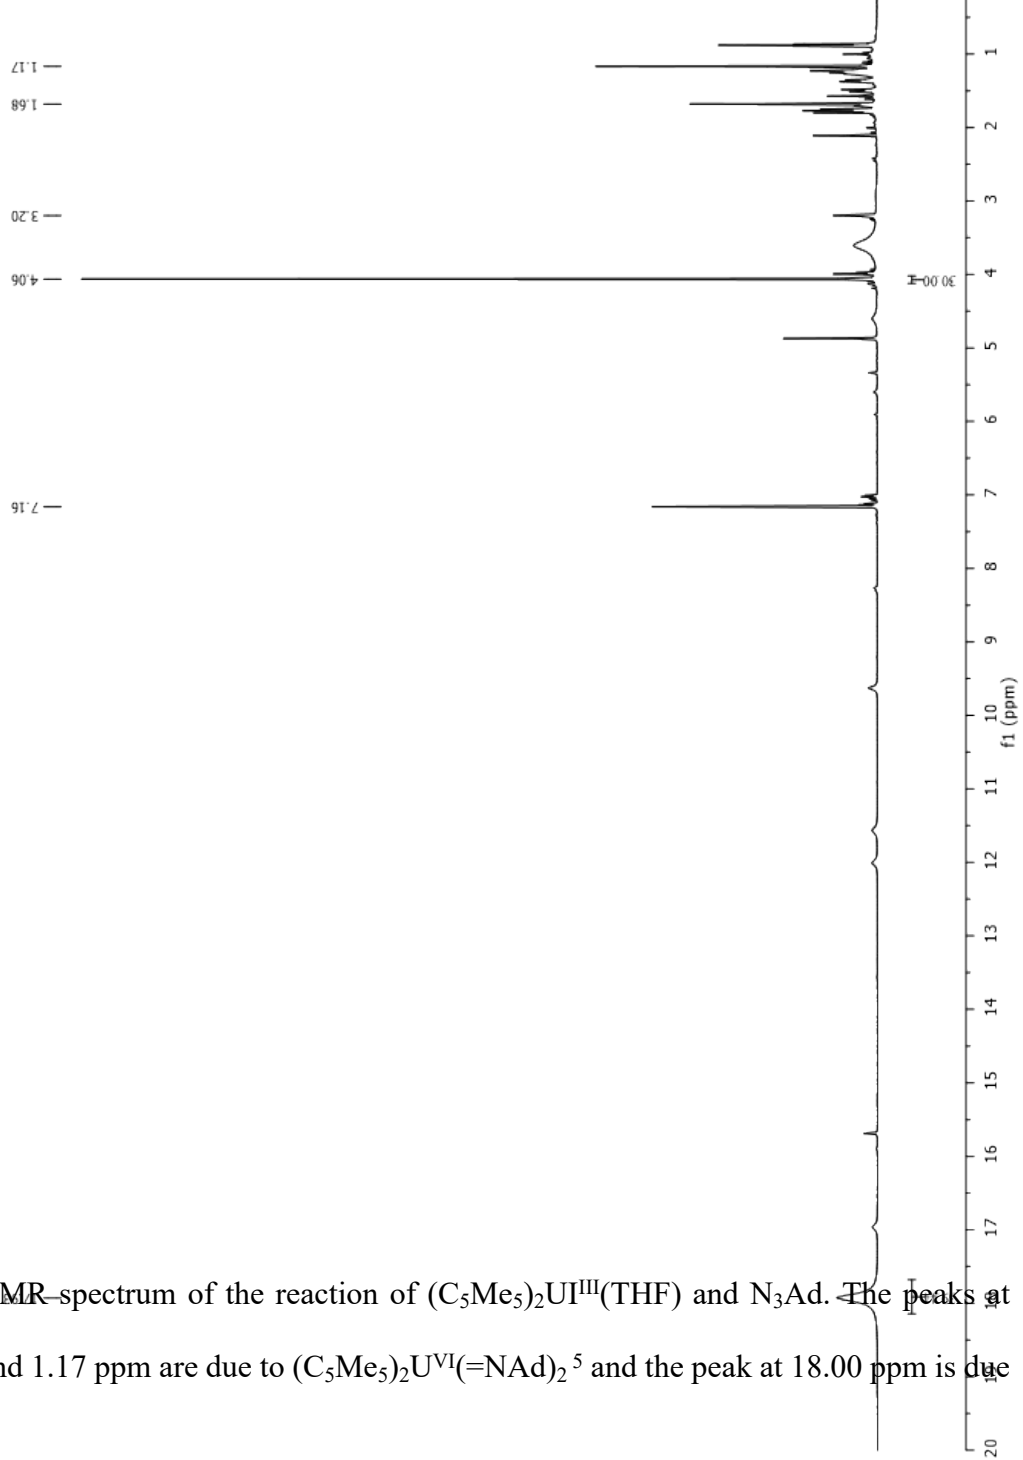

**Figure S2:**  $^1\text{H}$  NMR spectrum of the reaction of  $(\text{C}_5\text{Me}_5)_2\text{UI}^{\text{III}}(\text{THF})$  and  $\text{N}_3\text{Ad}$ . The peaks at 4.07, 3.20, 1.68, and 1.17 ppm are due to  $(\text{C}_5\text{Me}_5)_2\text{U}^{\text{VI}}(\text{=NAd})_2$ <sup>5</sup> and the peak at 18.00 ppm is due to  $(\text{C}_5\text{Me}_5)_2\text{U}^{\text{VI}}\text{I}_2$ .<sup>4</sup>

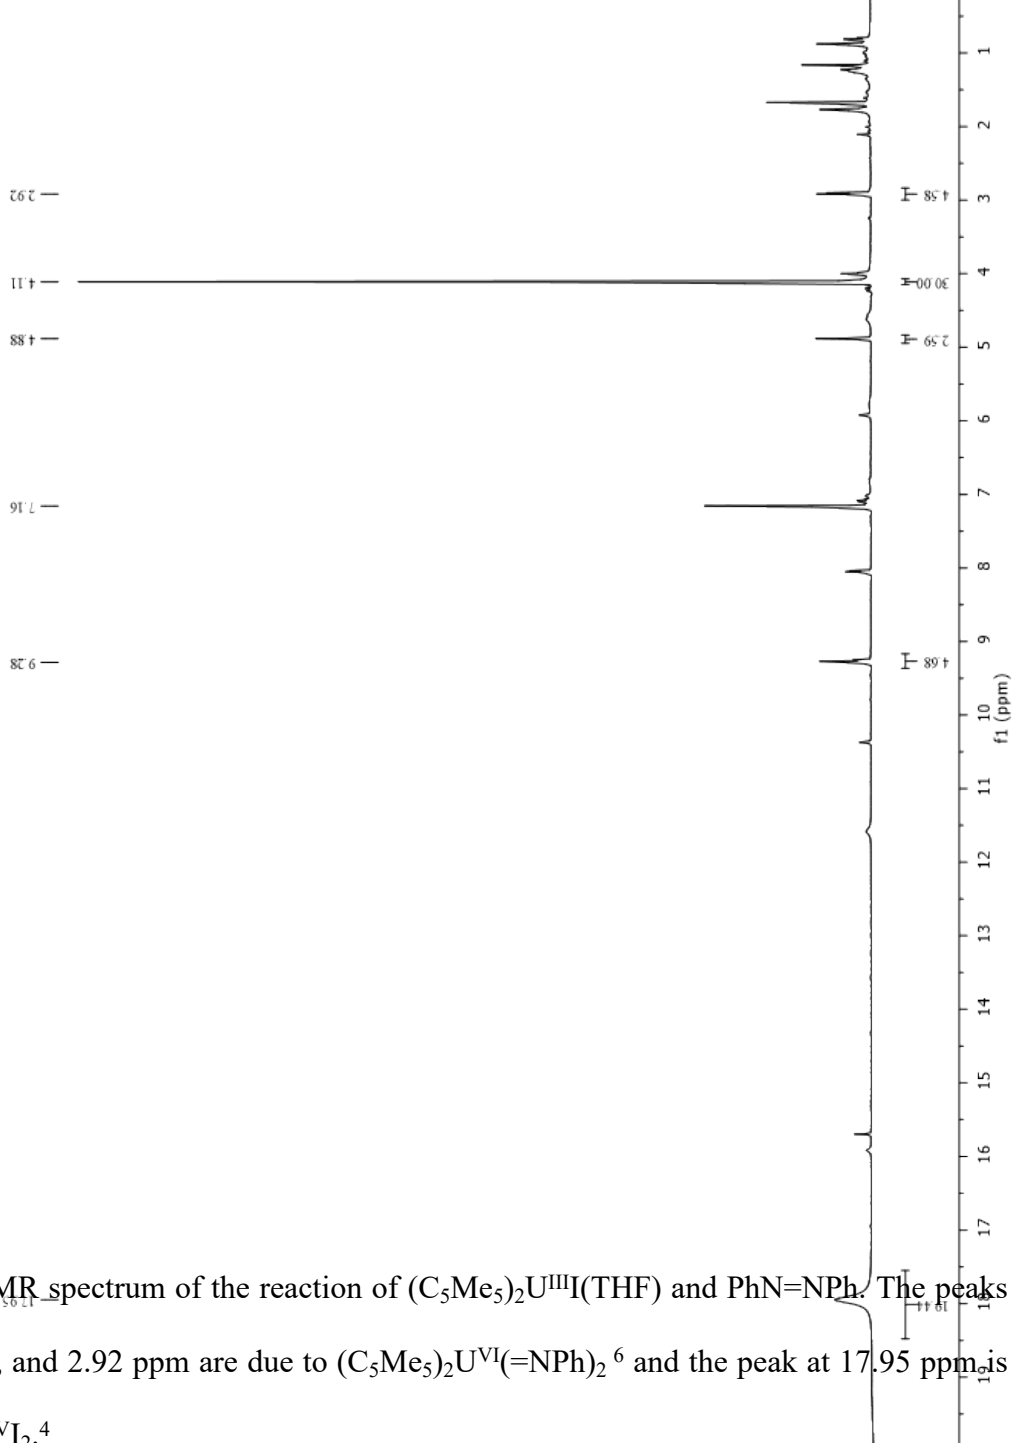

**Figure S3:**  $^1\text{H}$  NMR spectrum of the reaction of  $(\text{C}_5\text{Me}_5)_2\text{U}^{\text{III}}(\text{THF})$  and  $\text{PhN}=\text{NPh}$ . The peaks at 9.28, 4.88, 4.11, and 2.92 ppm are due to  $(\text{C}_5\text{Me}_5)_2\text{U}^{\text{VI}}(=\text{NPh})_2$ <sup>6</sup> and the peak at 17.95 ppm is due to  $(\text{C}_5\text{Me}_5)_2\text{U}^{\text{IV}}\text{I}_2$ .<sup>4</sup>

#### X-ray Data Collection, Structure Solution and Refinement for **1**.

A brown crystal of approximate dimensions 0.059 x 0.091 x 0.213 mm was mounted in a cryoloop and transferred to a Bruker SMART APEX II diffractometer system. The APEX2<sup>7</sup> program package was used to determine the unit-cell parameters and for data collection (120 sec/frame scan time). The raw frame data was processed using SAINT<sup>8</sup> and SADABS<sup>9</sup> to yield the reflection data file. Subsequent calculations were carried out using the SHELXTL<sup>10</sup> program

package. The diffraction symmetry was  $2/m$  and the systematic absences were consistent with the monoclinic space groups  $P2_1$  and  $P2_1/m$ . It was later determined that space group  $P2_1/m$  was correct.

The structure was solved by direct methods and refined on  $F^2$  by full-matrix least-squares techniques. The analytical scattering factors<sup>11</sup> for neutral atoms were used throughout the analysis. Hydrogen atoms were included using a riding model. There were two molecules of the formula-unit present, each located on a mirror plane. The pentamethylcyclopentadienyl ligands were disordered and included using multiple components, partial site-occupancy-factors, geometric and displacements constraints.

Least-squares analysis yielded  $wR2 = 0.1737$  and  $Goof = 1.075$  for 153 variables refined against 6170 data ( $0.82 \text{ \AA}$ ),  $R1 = 0.0670$  for those 4634 data with  $I > 2.0\sigma(I)$ .

There were several high residuals present in the final difference-Fourier map. It was not possible to determine the nature of the residuals although it was probable that *n*-hexane solvent was present. The SQUEEZE<sup>12a</sup> routine in the PLATON<sup>12b</sup> program package was used to account for the electrons in the solvent accessible voids.

**Table S1:** Crystal data and structure refinement for **1**.

|                      |                               |                                |
|----------------------|-------------------------------|--------------------------------|
| Identification code  | jcw104                        |                                |
| Empirical formula    | $C_{23} H_{39} I N Si U$      |                                |
| Formula weight       | 722.57                        |                                |
| Temperature          | 133(2) K                      |                                |
| Wavelength           | 0.71073 $\text{\AA}$          |                                |
| Crystal system       | Monoclinic                    |                                |
| Space group          | $P2_1/m$                      |                                |
| Unit cell dimensions | $a = 10.0187(12) \text{ \AA}$ | $\alpha = 90^\circ$ .          |
|                      | $b = 15.8538(19) \text{ \AA}$ | $\beta = 101.6286(18)^\circ$ . |



|                                             |                                                              |                       |
|---------------------------------------------|--------------------------------------------------------------|-----------------------|
|                                             | $c = 19.991(2) \text{ \AA}$                                  | $\gamma = 90^\circ$ . |
| Volume                                      | 3110.2(6) $\text{\AA}^3$                                     |                       |
| Z                                           | 4                                                            |                       |
| Density (calculated)                        | 1.543 $\text{Mg/m}^3$                                        |                       |
| Absorption coefficient                      | 6.257 $\text{mm}^{-1}$                                       |                       |
| F(000)                                      | 1372                                                         |                       |
| Crystal color                               | brown                                                        |                       |
| Crystal size                                | 0.213 x 0.091 x 0.059 $\text{mm}^3$                          |                       |
| Theta range for data collection             | 1.040 to 25.740°                                             |                       |
| Index ranges                                | $-12 \leq h \leq 12, -19 \leq k \leq 19, -24 \leq l \leq 24$ |                       |
| Reflections collected                       | 35670                                                        |                       |
| Independent reflections                     | 6170 [R(int) = 0.0722]                                       |                       |
| Completeness to theta = 25.242°             | 100.0 %                                                      |                       |
| Absorption correction                       | Semi-empirical from equivalents                              |                       |
| Max. and min. transmission                  | 0.2594 and 0.1951                                            |                       |
| Refinement method                           | Full-matrix least-squares on F <sup>2</sup>                  |                       |
| Data / restraints / parameters              | 6170 / 0 / 153                                               |                       |
| Goodness-of-fit on F <sup>2</sup>           | 1.075                                                        |                       |
| Final R indices [I > 2sigma(I) = 4634 data] | R1 = 0.0670, wR2 = 0.1616                                    |                       |
| R indices (all data, 0.82 $\text{\AA}$ )    | R1 = 0.0911, wR2 = 0.1737                                    |                       |
| Largest diff. peak and hole                 | 2.934 and -2.413 $\text{e.\AA}^{-3}$                         |                       |

**Table S2:** Bond lengths [ $\text{\AA}$ ] and angles [ $^\circ$ ] for **1**.

|              |           |               |            |
|--------------|-----------|---------------|------------|
| U(1)-Cnt1    | 2.525     | U(1)-C(3B)#1  | 2.85(3)    |
| U(1)-N(1)    | 2.061(10) | U(1)-C(5)     | 2.877(18)  |
| U(1)-C(2)#1  | 2.69(4)   | U(1)-C(5)#1   | 2.88(4)    |
| U(1)-C(2)    | 2.692(19) | U(1)-C(4)     | 2.898(19)  |
| U(1)-C(1B)#1 | 2.731(13) | U(1)-C(4)#1   | 2.90(4)    |
| U(1)-C(1B)   | 2.731(13) | U(1)-I(1)     | 3.1137(14) |
| U(1)-C(5B)   | 2.745(11) | Si(1)-N(1)    | 1.662(12)  |
| U(1)-C(5B)#1 | 2.75(3)   | Si(1)-C(11)   | 1.84(3)    |
| U(1)-C(1)    | 2.750(17) | Si(1)-C(12)#1 | 1.84(3)    |
| U(1)-C(1)#1  | 2.750(17) | Si(1)-C(12)   | 1.84(3)    |
| U(1)-C(3)#1  | 2.79(4)   | C(1)-C(2)     | 1.403(10)  |
| U(1)-C(3)    | 2.79(2)   | C(1)-C(5)     | 1.403(10)  |
| U(1)-C(2B)#1 | 2.80(3)   | C(1)-C(6)     | 1.492(11)  |
| U(1)-C(2B)   | 2.797(13) | C(2)-C(3)     | 1.403(10)  |
| U(1)-C(4B)   | 2.820(11) | C(2)-C(7)     | 1.492(10)  |
| U(1)-C(4B)#1 | 2.82(3)   | C(3)-C(4)     | 1.403(10)  |
| U(1)-C(3B)   | 2.852(13) | C(3)-C(8)     | 1.492(11)  |

|               |            |                      |           |
|---------------|------------|----------------------|-----------|
| C(4)-C(5)     | 1.403(10)  | C(13)-C(14)          | 1.402(6)  |
| C(4)-C(9)     | 1.492(11)  | C(13)-C(17)          | 1.402(6)  |
| C(5)-C(10)    | 1.492(10)  | C(13)-C(19)          | 1.490(6)  |
| C(1B)-C(5B)   | 1.410(6)   | C(14)-C(15)          | 1.402(6)  |
| C(1B)-C(2B)   | 1.410(6)   | C(14)-C(20)          | 1.490(6)  |
| C(1B)-C(6B)   | 1.490(7)   | C(15)-C(16)          | 1.402(6)  |
| C(2B)-C(3B)   | 1.410(6)   | C(15)-C(21)          | 1.490(6)  |
| C(2B)-C(7B)   | 1.490(7)   | C(16)-C(17)          | 1.402(6)  |
| C(3B)-C(4B)   | 1.410(6)   | C(16)-C(22)          | 1.490(6)  |
| C(3B)-C(8B)   | 1.490(7)   | C(17)-C(18)          | 1.490(6)  |
| C(4B)-C(5B)   | 1.410(6)   | C(13B)-C(17B)        | 1.409(10) |
| C(4B)-C(9B)   | 1.490(7)   | C(13B)-C(14B)        | 1.409(10) |
| C(5B)-C(10B)  | 1.490(7)   | C(13B)-C(19B)        | 1.488(11) |
| U(2)-Cnt2     | 2.513      | C(14B)-C(15B)        | 1.409(10) |
| U(2)-N(2)     | 2.100(13)  | C(14B)-C(20B)        | 1.488(11) |
| U(2)-C(13B)   | 2.665(18)  | C(15B)-C(16B)        | 1.409(10) |
| U(2)-C(13B)#2 | 2.665(18)  | C(15B)-C(21B)        | 1.488(11) |
| U(2)-C(14)#2  | 2.71(2)    | C(16B)-C(17B)        | 1.409(10) |
| U(2)-C(14)    | 2.709(11)  | C(16B)-C(22B)        | 1.488(11) |
| U(2)-C(17B)#2 | 2.73(4)    | C(17B)-C(18B)        | 1.488(11) |
| U(2)-C(17B)   | 2.735(19)  |                      |           |
| U(2)-C(15)    | 2.748(10)  | Cnt1-U(1)-I(1)       | 111.3     |
| U(2)-C(15)#2  | 2.75(2)    | Cnt1-U(1)-N(1)       | 103.1     |
| U(2)-C(14B)#2 | 2.76(4)    | Cnt1-U(1)-Cnt1       | 132.1     |
| U(2)-C(14B)   | 2.759(17)  | N(1)-U(1)-C(2)#1     | 122.3(10) |
| U(2)-C(13)    | 2.782(11)  | N(1)-U(1)-C(2)       | 122.3(4)  |
| U(2)-C(13)#2  | 2.782(11)  | C(2)#1-U(1)-C(2)     | 115.4(12) |
| U(2)-C(16)    | 2.844(10)  | N(1)-U(1)-C(1B)#1    | 89.2(2)   |
| U(2)-C(16)#2  | 2.84(2)    | N(1)-U(1)-C(1B)      | 89.2(2)   |
| U(2)-C(17)#2  | 2.86(3)    | C(1B)#1-U(1)-C(1B)   | 178.3(5)  |
| U(2)-C(17)    | 2.864(11)  | N(1)-U(1)-C(5B)      | 79.7(3)   |
| U(2)-C(16B)#2 | 2.87(4)    | C(1B)#1-U(1)-C(5B)   | 149.1(4)  |
| U(2)-C(16B)   | 2.868(19)  | C(1B)-U(1)-C(5B)     | 29.84(16) |
| U(2)-C(15B)#2 | 2.88(4)    | N(1)-U(1)-C(5B)#1    | 79.7(7)   |
| U(2)-C(15B)   | 2.882(18)  | C(1B)#1-U(1)-C(5B)#1 | 29.8(6)   |
| U(2)-I(2)     | 3.1074(14) | C(1B)-U(1)-C(5B)#1   | 149.1(6)  |
| Si(2)-N(2)    | 1.619(14)  | C(5B)-U(1)-C(5B)#1   | 119.2(7)  |
| Si(2)-C(23)   | 1.85(2)    | N(1)-U(1)-C(1)       | 93.1(4)   |
| Si(2)-C(24)   | 1.85(2)    | C(2)#1-U(1)-C(1)     | 144.4(11) |
| Si(2)-C(24)#2 | 1.85(2)    | C(2)-U(1)-C(1)       | 29.9(3)   |

|                      |           |                      |           |
|----------------------|-----------|----------------------|-----------|
| N(1)-U(1)-C(1)#1     | 93.1(4)   | C(4B)-U(1)-C(4B)#1   | 83.0(6)   |
| C(2)#1-U(1)-C(1)#1   | 29.9(10)  | N(1)-U(1)-C(3B)      | 127.7(3)  |
| C(2)-U(1)-C(1)#1     | 144.4(7)  | C(1B)#1-U(1)-C(3B)   | 132.9(4)  |
| C(1)-U(1)-C(1)#1     | 167.4(8)  | C(1B)-U(1)-C(3B)     | 48.2(3)   |
| N(1)-U(1)-C(3)#1     | 121.3(8)  | C(5B)-U(1)-C(3B)     | 48.1(2)   |
| C(2)#1-U(1)-C(3)#1   | 29.6(6)   | C(5B)#1-U(1)-C(3B)   | 119.6(7)  |
| C(2)-U(1)-C(3)#1     | 107.0(10) | C(2B)#1-U(1)-C(3B)   | 107.8(7)  |
| C(1)-U(1)-C(3)#1     | 134.7(8)  | C(2B)-U(1)-C(3B)     | 28.89(16) |
| C(1)#1-U(1)-C(3)#1   | 48.4(10)  | C(4B)-U(1)-C(3B)     | 28.79(15) |
| N(1)-U(1)-C(3)       | 121.3(4)  | C(4B)#1-U(1)-C(3B)   | 90.9(6)   |
| C(2)#1-U(1)-C(3)     | 107.0(11) | N(1)-U(1)-C(3B)#1    | 127.7(5)  |
| C(2)-U(1)-C(3)       | 29.6(3)   | C(1B)#1-U(1)-C(3B)#1 | 48.2(6)   |
| C(1)-U(1)-C(3)       | 48.4(4)   | C(1B)-U(1)-C(3B)#1   | 132.9(5)  |
| C(1)#1-U(1)-C(3)     | 134.7(6)  | C(5B)-U(1)-C(3B)#1   | 119.6(5)  |
| C(3)#1-U(1)-C(3)     | 86.9(10)  | C(5B)#1-U(1)-C(3B)#1 | 48.1(6)   |
| N(1)-U(1)-C(2B)#1    | 118.7(6)  | C(2B)#1-U(1)-C(3B)#1 | 28.9(4)   |
| C(1B)#1-U(1)-C(2B)#1 | 29.5(7)   | C(2B)-U(1)-C(3B)#1   | 107.8(5)  |
| C(1B)-U(1)-C(2B)#1   | 152.1(7)  | C(4B)-U(1)-C(3B)#1   | 90.9(6)   |
| C(5B)-U(1)-C(2B)#1   | 148.5(7)  | C(4B)#1-U(1)-C(3B)#1 | 28.8(3)   |
| C(5B)#1-U(1)-C(2B)#1 | 48.6(6)   | C(3B)-U(1)-C(3B)#1   | 84.7(6)   |
| N(1)-U(1)-C(2B)      | 118.7(2)  | N(1)-U(1)-C(5)       | 77.2(4)   |
| C(1B)#1-U(1)-C(2B)   | 152.1(4)  | C(2)#1-U(1)-C(5)     | 153.2(11) |
| C(1B)-U(1)-C(2B)     | 29.53(17) | C(2)-U(1)-C(5)       | 48.0(4)   |
| C(5B)-U(1)-C(2B)     | 48.6(3)   | C(1)-U(1)-C(5)       | 28.8(2)   |
| C(5B)#1-U(1)-C(2B)   | 148.5(7)  | C(1)#1-U(1)-C(5)     | 163.8(7)  |
| C(2B)#1-U(1)-C(2B)   | 122.6(7)  | C(3)#1-U(1)-C(5)     | 126.3(9)  |
| N(1)-U(1)-C(4B)      | 102.5(3)  | C(3)-U(1)-C(5)       | 47.2(4)   |
| C(1B)#1-U(1)-C(4B)   | 131.5(4)  | N(1)-U(1)-C(5)#1     | 77.2(9)   |
| C(1B)-U(1)-C(4B)     | 48.5(2)   | C(2)#1-U(1)-C(5)#1   | 48.0(9)   |
| C(5B)-U(1)-C(4B)     | 29.31(16) | C(2)-U(1)-C(5)#1     | 153.2(11) |
| C(5B)#1-U(1)-C(4B)   | 105.7(7)  | C(1)-U(1)-C(5)#1     | 163.8(11) |
| C(2B)#1-U(1)-C(4B)   | 119.5(7)  | C(1)#1-U(1)-C(5)#1   | 28.8(10)  |
| C(2B)-U(1)-C(4B)     | 47.9(2)   | C(3)#1-U(1)-C(5)#1   | 47.2(8)   |
| N(1)-U(1)-C(4B)#1    | 102.5(6)  | C(3)-U(1)-C(5)#1     | 126.3(11) |
| C(1B)#1-U(1)-C(4B)#1 | 48.5(5)   | C(5)-U(1)-C(5)#1     | 135.0(11) |
| C(1B)-U(1)-C(4B)#1   | 131.5(5)  | N(1)-U(1)-C(4)       | 93.3(4)   |
| C(5B)-U(1)-C(4B)#1   | 105.7(6)  | C(2)#1-U(1)-C(4)     | 125.7(11) |
| C(5B)#1-U(1)-C(4B)#1 | 29.3(4)   | C(2)-U(1)-C(4)       | 47.7(4)   |
| C(2B)#1-U(1)-C(4B)#1 | 47.9(6)   | C(1)-U(1)-C(4)       | 47.3(4)   |
| C(2B)-U(1)-C(4B)#1   | 119.5(5)  | C(1)#1-U(1)-C(4)     | 143.0(6)  |

|                     |           |                     |          |
|---------------------|-----------|---------------------|----------|
| C(3)#1-U(1)-C(4)    | 98.2(9)   | C(12)#1-Si(1)-C(12) | 109(2)   |
| C(3)-U(1)-C(4)      | 28.5(2)   | Si(1)-N(1)-U(1)     | 164.0(7) |
| C(5)-U(1)-C(4)      | 28.1(2)   | C(2)-C(1)-C(5)      | 108.0    |
| C(5)#1-U(1)-C(4)    | 119.4(11) | C(2)-C(1)-C(6)      | 126.0    |
| N(1)-U(1)-C(4)#1    | 93.3(9)   | C(5)-C(1)-C(6)      | 126.0    |
| C(2)#1-U(1)-C(4)#1  | 47.7(8)   | C(2)-C(1)-U(1)      | 72.8(6)  |
| C(2)-U(1)-C(4)#1    | 125.7(10) | C(5)-C(1)-U(1)      | 80.6(6)  |
| C(1)-U(1)-C(4)#1    | 143.0(8)  | C(6)-C(1)-U(1)      | 113.0(6) |
| C(1)#1-U(1)-C(4)#1  | 47.3(10)  | C(1)-C(2)-C(3)      | 108.0    |
| C(3)#1-U(1)-C(4)#1  | 28.5(5)   | C(1)-C(2)-C(7)      | 126.0    |
| C(3)-U(1)-C(4)#1    | 98.2(10)  | C(3)-C(2)-C(7)      | 126.0    |
| C(5)-U(1)-C(4)#1    | 119.4(9)  | C(1)-C(2)-U(1)      | 77.4(6)  |
| C(5)#1-U(1)-C(4)#1  | 28.1(5)   | C(3)-C(2)-U(1)      | 78.9(6)  |
| C(4)-U(1)-C(4)#1    | 95.9(10)  | C(7)-C(2)-U(1)      | 110.5(6) |
| N(1)-U(1)-I(1)      | 82.4(3)   | C(4)-C(3)-C(2)      | 108.0    |
| C(2)#1-U(1)-I(1)    | 95.3(10)  | C(4)-C(3)-C(8)      | 126.0    |
| C(2)-U(1)-I(1)      | 95.3(4)   | C(2)-C(3)-C(8)      | 126.0    |
| C(1B)#1-U(1)-I(1)   | 90.2(2)   | C(4)-C(3)-U(1)      | 80.2(6)  |
| C(1B)-U(1)-I(1)     | 90.2(2)   | C(2)-C(3)-U(1)      | 71.5(6)  |
| C(5B)-U(1)-I(1)     | 116.5(2)  | C(8)-C(3)-U(1)      | 114.6(6) |
| C(5B)#1-U(1)-I(1)   | 116.5(6)  | C(3)-C(4)-C(5)      | 108.0    |
| C(1)-U(1)-I(1)      | 85.0(4)   | C(3)-C(4)-C(9)      | 126.0    |
| C(1)#1-U(1)-I(1)    | 85.0(4)   | C(5)-C(4)-C(9)      | 126.0    |
| C(3)#1-U(1)-I(1)    | 124.9(8)  | C(3)-C(4)-U(1)      | 71.3(6)  |
| C(3)-U(1)-I(1)      | 124.9(3)  | C(5)-C(4)-U(1)      | 75.1(6)  |
| C(2B)#1-U(1)-I(1)   | 92.4(6)   | C(9)-C(4)-U(1)      | 119.4(6) |
| C(2B)-U(1)-I(1)     | 92.4(2)   | C(1)-C(5)-C(4)      | 108.0    |
| C(4B)-U(1)-I(1)     | 137.7(2)  | C(1)-C(5)-C(10)     | 126.0    |
| C(4B)#1-U(1)-I(1)   | 137.7(5)  | C(4)-C(5)-C(10)     | 126.0    |
| C(3B)-U(1)-I(1)     | 119.5(2)  | C(1)-C(5)-U(1)      | 70.6(6)  |
| C(3B)#1-U(1)-I(1)   | 119.5(5)  | C(4)-C(5)-U(1)      | 76.8(6)  |
| C(5)-U(1)-I(1)      | 106.3(3)  | C(10)-C(5)-U(1)     | 118.5(6) |
| C(5)#1-U(1)-I(1)    | 106.3(10) | C(5B)-C(1B)-C(2B)   | 108.0    |
| C(4)-U(1)-I(1)      | 132.0(3)  | C(5B)-C(1B)-C(6B)   | 126.0    |
| C(4)#1-U(1)-I(1)    | 132.0(8)  | C(2B)-C(1B)-C(6B)   | 126.0    |
| N(1)-Si(1)-C(11)    | 110.3(10) | C(5B)-C(1B)-U(1)    | 75.6(4)  |
| N(1)-Si(1)-C(12)#1  | 111.8(9)  | C(2B)-C(1B)-U(1)    | 77.8(4)  |
| C(11)-Si(1)-C(12)#1 | 106.8(9)  | C(6B)-C(1B)-U(1)    | 112.9(4) |
| N(1)-Si(1)-C(12)    | 111.8(8)  | C(3B)-C(2B)-C(1B)   | 108.0    |
| C(11)-Si(1)-C(12)   | 106.8(9)  | C(3B)-C(2B)-C(7B)   | 126.0    |

|                        |           |                        |           |
|------------------------|-----------|------------------------|-----------|
| C(1B)-C(2B)-C(7B)      | 126.0     | C(14)-U(2)-C(15)       | 29.75(14) |
| C(3B)-C(2B)-U(1)       | 77.7(4)   | N(2)-U(2)-C(15)#2      | 79.7(6)   |
| C(1B)-C(2B)-U(1)       | 72.6(4)   | C(14)#2-U(2)-C(15)#2   | 29.8(4)   |
| C(7B)-C(2B)-U(1)       | 115.8(4)  | C(14)-U(2)-C(15)#2     | 147.5(6)  |
| C(2B)-C(3B)-C(4B)      | 108.0     | C(15)-U(2)-C(15)#2     | 117.8(6)  |
| C(2B)-C(3B)-C(8B)      | 126.0     | N(2)-U(2)-C(14B)#2     | 93.8(11)  |
| C(4B)-C(3B)-C(8B)      | 126.0     | C(13B)-U(2)-C(14B)#2   | 142.7(12) |
| C(2B)-C(3B)-U(1)       | 73.4(4)   | C(13B)#2-U(2)-C(14B)#2 | 30.1(11)  |
| C(4B)-C(3B)-U(1)       | 74.4(4)   | C(17B)#2-U(2)-C(14B)#2 | 49.0(10)  |
| C(8B)-C(3B)-U(1)       | 118.1(4)  | C(17B)-U(2)-C(14B)#2   | 137.1(11) |
| C(5B)-C(4B)-C(3B)      | 108.0     | N(2)-U(2)-C(14B)       | 93.8(4)   |
| C(5B)-C(4B)-C(9B)      | 126.0     | C(13B)-U(2)-C(14B)     | 30.1(3)   |
| C(3B)-C(4B)-C(9B)      | 126.0     | C(13B)#2-U(2)-C(14B)   | 142.7(7)  |
| C(5B)-C(4B)-U(1)       | 72.4(4)   | C(17B)#2-U(2)-C(14B)   | 137.1(9)  |
| C(3B)-C(4B)-U(1)       | 76.8(4)   | C(17B)-U(2)-C(14B)     | 49.0(4)   |
| C(9B)-C(4B)-U(1)       | 116.8(4)  | C(14B)#2-U(2)-C(14B)   | 162.1(11) |
| C(4B)-C(5B)-C(1B)      | 108.0     | N(2)-U(2)-C(13)        | 118.8(2)  |
| C(4B)-C(5B)-C(10B)     | 126.0     | C(14)#2-U(2)-C(13)     | 152.0(7)  |
| C(1B)-C(5B)-C(10B)     | 126.0     | C(14)-U(2)-C(13)       | 29.54(15) |
| C(4B)-C(5B)-U(1)       | 78.3(4)   | C(15)-U(2)-C(13)       | 48.4(2)   |
| C(1B)-C(5B)-U(1)       | 74.5(4)   | C(15)#2-U(2)-C(13)     | 146.9(6)  |
| C(10B)-C(5B)-U(1)      | 113.6(4)  | N(2)-U(2)-C(13)#2      | 118.8(2)  |
| Cnt2-U(2)-I(2)         | 110.8     | C(14)#2-U(2)-C(13)#2   | 29.5(7)   |
| Cnt2-U(2)-N(2)         | 102.8     | C(14)-U(2)-C(13)#2     | 152.0(4)  |
| Cnt2-U(2)-Cnt2         | 133.4     | C(15)-U(2)-C(13)#2     | 146.9(3)  |
| N(2)-U(2)-C(13B)       | 122.8(4)  | C(15)#2-U(2)-C(13)#2   | 48.4(6)   |
| N(2)-U(2)-C(13B)#2     | 122.8(4)  | C(13)-U(2)-C(13)#2     | 122.5(4)  |
| C(13B)-U(2)-C(13B)#2   | 114.4(8)  | N(2)-U(2)-C(16)        | 102.3(3)  |
| N(2)-U(2)-C(14)#2      | 89.2(6)   | C(14)#2-U(2)-C(16)     | 130.0(6)  |
| N(2)-U(2)-C(14)        | 89.2(2)   | C(14)-U(2)-C(16)       | 48.1(2)   |
| C(14)#2-U(2)-C(14)     | 177.2(7)  | C(15)-U(2)-C(16)       | 28.97(14) |
| N(2)-U(2)-C(17B)#2     | 120.2(8)  | C(15)#2-U(2)-C(16)     | 104.3(6)  |
| C(13B)-U(2)-C(17B)#2   | 108.5(10) | C(13)-U(2)-C(16)       | 47.5(2)   |
| C(13B)#2-U(2)-C(17B)#2 | 30.2(9)   | C(13)#2-U(2)-C(16)     | 118.3(3)  |
| N(2)-U(2)-C(17B)       | 120.2(4)  | N(2)-U(2)-C(16)#2      | 102.3(5)  |
| C(13B)-U(2)-C(17B)     | 30.2(3)   | C(14)#2-U(2)-C(16)#2   | 48.1(6)   |
| C(13B)#2-U(2)-C(17B)   | 108.5(7)  | C(14)-U(2)-C(16)#2     | 130.0(4)  |
| C(17B)#2-U(2)-C(17B)   | 89.2(11)  | C(15)-U(2)-C(16)#2     | 104.3(5)  |
| N(2)-U(2)-C(15)        | 79.7(3)   | C(15)#2-U(2)-C(16)#2   | 29.0(4)   |
| C(14)#2-U(2)-C(15)     | 147.5(7)  | C(13)-U(2)-C(16)#2     | 118.3(5)  |

|                        |           |                        |           |
|------------------------|-----------|------------------------|-----------|
| C(13)#2-U(2)-C(16)#2   | 47.5(5)   | C(17B)-U(2)-C(15B)#2   | 130.3(11) |
| C(16)-U(2)-C(16)#2     | 81.9(6)   | C(14B)#2-U(2)-C(15B)#2 | 28.8(6)   |
| N(2)-U(2)-C(17)#2      | 127.3(5)  | C(14B)-U(2)-C(15B)#2   | 168.1(11) |
| C(14)#2-U(2)-C(17)#2   | 47.9(6)   | C(16B)#2-U(2)-C(15B)#2 | 28.4(6)   |
| C(14)-U(2)-C(17)#2     | 131.9(4)  | C(16B)-U(2)-C(15B)#2   | 124.5(11) |
| C(15)-U(2)-C(17)#2     | 118.2(5)  | N(2)-U(2)-C(15B)       | 76.6(4)   |
| C(15)#2-U(2)-C(17)#2   | 47.6(5)   | C(13B)-U(2)-C(15B)     | 48.3(4)   |
| C(13)-U(2)-C(17)#2     | 107.2(5)  | C(13B)#2-U(2)-C(15B)   | 156.0(7)  |
| C(13)#2-U(2)-C(17)#2   | 28.7(4)   | C(17B)#2-U(2)-C(15B)   | 130.3(9)  |
| C(16)-U(2)-C(17)#2     | 89.9(5)   | C(17B)-U(2)-C(15B)     | 47.8(4)   |
| C(16)#2-U(2)-C(17)#2   | 28.4(3)   | C(14B)#2-U(2)-C(15B)   | 168.1(11) |
| N(2)-U(2)-C(17)        | 127.3(3)  | C(14B)-U(2)-C(15B)     | 28.8(2)   |
| C(14)#2-U(2)-C(17)     | 131.9(6)  | C(16B)#2-U(2)-C(15B)   | 124.5(10) |
| C(14)-U(2)-C(17)       | 47.9(2)   | C(16B)-U(2)-C(15B)     | 28.4(2)   |
| C(15)-U(2)-C(17)       | 47.6(2)   | C(15B)#2-U(2)-C(15B)   | 139.7(11) |
| C(15)#2-U(2)-C(17)     | 118.2(6)  | N(2)-U(2)-I(2)         | 81.7(3)   |
| C(13)-U(2)-C(17)       | 28.71(14) | C(13B)-U(2)-I(2)       | 94.6(4)   |
| C(13)#2-U(2)-C(17)     | 107.2(4)  | C(13B)#2-U(2)-I(2)     | 94.6(4)   |
| C(16)-U(2)-C(17)       | 28.44(14) | C(14)#2-U(2)-I(2)      | 91.1(6)   |
| C(16)#2-U(2)-C(17)     | 89.9(5)   | C(14)-U(2)-I(2)        | 91.1(2)   |
| C(17)#2-U(2)-C(17)     | 84.0(5)   | C(17B)#2-U(2)-I(2)     | 124.8(9)  |
| N(2)-U(2)-C(16B)#2     | 91.5(9)   | C(17B)-U(2)-I(2)       | 124.8(4)  |
| C(13B)-U(2)-C(16B)#2   | 129.2(11) | C(15)-U(2)-I(2)        | 117.0(2)  |
| C(13B)#2-U(2)-C(16B)#2 | 48.5(10)  | C(15)#2-U(2)-I(2)      | 117.0(5)  |
| C(17B)#2-U(2)-C(16B)#2 | 29.0(5)   | C(14B)#2-U(2)-I(2)     | 82.5(10)  |
| C(17B)-U(2)-C(16B)#2   | 102.0(11) | C(14B)-U(2)-I(2)       | 82.5(4)   |
| C(14B)#2-U(2)-C(16B)#2 | 47.7(9)   | C(13)-U(2)-I(2)        | 93.8(2)   |
| C(14B)-U(2)-C(16B)#2   | 148.1(9)  | C(13)#2-U(2)-I(2)      | 93.8(2)   |
| N(2)-U(2)-C(16B)       | 91.5(4)   | C(16)-U(2)-I(2)        | 138.4(2)  |
| C(13B)-U(2)-C(16B)     | 48.5(4)   | C(16)#2-U(2)-I(2)      | 138.4(4)  |
| C(13B)#2-U(2)-C(16B)   | 129.2(7)  | C(17)#2-U(2)-I(2)      | 120.9(5)  |
| C(17B)#2-U(2)-C(16B)   | 102.0(10) | C(17)-U(2)-I(2)        | 120.9(2)  |
| C(17B)-U(2)-C(16B)     | 29.0(2)   | C(16B)#2-U(2)-I(2)     | 129.4(9)  |
| C(14B)#2-U(2)-C(16B)   | 148.1(10) | C(16B)-U(2)-I(2)       | 129.4(4)  |
| C(14B)-U(2)-C(16B)     | 47.7(4)   | C(15B)#2-U(2)-I(2)     | 102.7(10) |
| C(16B)#2-U(2)-C(16B)   | 100.8(10) | C(15B)-U(2)-I(2)       | 102.7(4)  |
| N(2)-U(2)-C(15B)#2     | 76.6(10)  | N(2)-Si(2)-C(23)       | 110.9(10) |
| C(13B)-U(2)-C(15B)#2   | 156.0(12) | N(2)-Si(2)-C(24)       | 111.9(7)  |
| C(13B)#2-U(2)-C(15B)#2 | 48.3(11)  | C(23)-Si(2)-C(24)      | 107.3(8)  |
| C(17B)#2-U(2)-C(15B)#2 | 47.8(9)   | N(2)-Si(2)-C(24)#2     | 111.9(7)  |

|                     |           |                      |          |
|---------------------|-----------|----------------------|----------|
| C(23)-Si(2)-C(24)#2 | 107.3(8)  | C(18)-C(17)-U(2)     | 118.5(3) |
| C(24)-Si(2)-C(24)#2 | 107.3(18) | C(17B)-C(13B)-C(14B) | 108.0    |
| Si(2)-N(2)-U(2)     | 163.7(7)  | C(17B)-C(13B)-C(19B) | 126.0    |
| C(14)-C(13)-C(17)   | 108.0     | C(14B)-C(13B)-C(19B) | 126.0    |
| C(14)-C(13)-C(19)   | 126.0     | C(17B)-C(13B)-U(2)   | 77.6(6)  |
| C(17)-C(13)-C(19)   | 126.0     | C(14B)-C(13B)-U(2)   | 78.7(6)  |
| C(14)-C(13)-U(2)    | 72.3(3)   | C(19B)-C(13B)-U(2)   | 110.4(6) |
| C(17)-C(13)-U(2)    | 78.9(3)   | C(15B)-C(14B)-C(13B) | 108.0    |
| C(19)-C(13)-U(2)    | 115.0(3)  | C(15B)-C(14B)-C(20B) | 126.0    |
| C(15)-C(14)-C(13)   | 108.0     | C(13B)-C(14B)-C(20B) | 126.0    |
| C(15)-C(14)-C(20)   | 126.0     | C(15B)-C(14B)-U(2)   | 80.4(6)  |
| C(13)-C(14)-C(20)   | 126.0     | C(13B)-C(14B)-U(2)   | 71.3(6)  |
| C(15)-C(14)-U(2)    | 76.7(3)   | C(20B)-C(14B)-U(2)   | 114.5(6) |
| C(13)-C(14)-U(2)    | 78.1(4)   | C(14B)-C(15B)-C(16B) | 108.0    |
| C(20)-C(14)-U(2)    | 111.8(3)  | C(14B)-C(15B)-C(21B) | 126.0    |
| C(14)-C(15)-C(16)   | 108.0     | C(16B)-C(15B)-C(21B) | 126.0    |
| C(14)-C(15)-C(21)   | 126.0     | C(14B)-C(15B)-U(2)   | 70.7(5)  |
| C(16)-C(15)-C(21)   | 126.0     | C(16B)-C(15B)-U(2)   | 75.3(6)  |
| C(14)-C(15)-U(2)    | 73.6(3)   | C(21B)-C(15B)-U(2)   | 119.8(6) |
| C(16)-C(15)-U(2)    | 79.3(3)   | C(17B)-C(16B)-C(15B) | 108.0    |
| C(21)-C(15)-U(2)    | 113.5(3)  | C(17B)-C(16B)-C(22B) | 126.0    |
| C(15)-C(16)-C(17)   | 108.0     | C(15B)-C(16B)-C(22B) | 126.0    |
| C(15)-C(16)-C(22)   | 126.0     | C(17B)-C(16B)-U(2)   | 70.2(6)  |
| C(17)-C(16)-C(22)   | 126.0     | C(15B)-C(16B)-U(2)   | 76.4(6)  |
| C(15)-C(16)-U(2)    | 71.7(3)   | C(22B)-C(16B)-U(2)   | 119.2(5) |
| C(17)-C(16)-U(2)    | 76.6(3)   | C(16B)-C(17B)-C(13B) | 108.0    |
| C(22)-C(16)-U(2)    | 117.6(3)  | C(16B)-C(17B)-C(18B) | 126.0    |
| C(13)-C(17)-C(16)   | 108.0     | C(13B)-C(17B)-C(18B) | 126.0    |
| C(13)-C(17)-C(18)   | 126.0     | C(16B)-C(17B)-U(2)   | 80.8(6)  |
| C(16)-C(17)-C(18)   | 126.0     | C(13B)-C(17B)-U(2)   | 72.1(6)  |
| C(13)-C(17)-U(2)    | 72.4(3)   | C(18B)-C(17B)-U(2)   | 113.4(6) |
| C(16)-C(17)-U(2)    | 75.0(3)   |                      |          |

---

Symmetry transformations used to generate equivalent atoms:

#1  $x, -y+1/2, z$  #2  $x, -y+3/2, z$

## References

1. L. R. Avens, C. J. Burns, R. J. Butcher, D. L. Clark, J. C. Gordon, A. R. Schake, B. L. Scott, J. G. Watkin and B. D. Zwick, *Organometallics*, 2000, **19**, 451–457.

2. J. C. Wedal, C. J. Windorff, D. N. Huh, A. J. Ryan, J. W. Ziller and W. J. Evans, *J. Coord. Chem.*, 2021, **74**, 74–91.
3. P. Rungthanaphatsophon, C. L. Barnes, S. P. Kelley and J. R. Walensky, *Dalton Trans.*, 2018, **47**, 8189–8192.
4. J. Maynadié, J.-C. Berthet, P. Thuéry and M. Ephritikhine, *J. Am. Chem. Soc.*, 2006, **128**, 1082–1083.
5. B. P. Warner, B. L. Scott and C. J. Burns, *Angew. Chem. Int. Ed.*, 1998, **37**, 959–960.
6. D. S. J. Arney, C. J. Burns and D. C. Smith, *J. Am. Chem. Soc.* 1992, **114**, 10068–10069.
7. APEX2 Version 2014.11-0, Bruker AXS, Inc.; Madison, WI 2014.
8. SAINT Version 8.34a, Bruker AXS, Inc.; Madison, WI 2013.
9. Sheldrick, G. M. SADABS, Version 2014/5, Bruker AXS, Inc.; Madison, WI 2014.
10. Sheldrick, G. M. SHELXTL, Version 2014/7, Bruker AXS, Inc.; Madison, WI 2014.
11. International Tables for Crystallography **1992**, Vol. C., Dordrecht: Kluwer Academic Publishers.
12. (a) Spek, A.L. SQUEEZE, *Acta Cryst.* **2015**, *C71*, 9-19., (b) Spek, A. L. PLATON, *Acta. Cryst.* **2009**, *D65*, 148-155

### Definitions:

$$wR2 = [\Sigma[w(F_o^2 - F_c^2)^2] / \Sigma[w(F_o^2)^2]]^{1/2}$$

$$R1 = \Sigma||F_o| - |F_c|| / \Sigma|F_o|$$

Goof = S =  $[\Sigma[w(F_o^2 - F_c^2)^2] / (n-p)]^{1/2}$  where n is the number of reflections and p is the total number of parameters refined.
